# Supplementary material for: Holistic Approach for Estimating Water Quality Ecosystem Services of Danube Floodplains: Field Measures, Remote Sensing, and Machine Learning
Source: MDPI journal article supplement (doi:10.3390/hydrobiology1020016), 2022-05-16
Supplement: s1 [file s1]

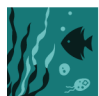

# Holistic Approach for Estimating Water Quality Ecosystem Services of Danube Floodplains: Field Measures, Remote Sensing, and Machine Learning

Alain Hoyek, Leonardo F. Arias-Rodriguez \* and Francesca Perosa

## Supplementary Materials:

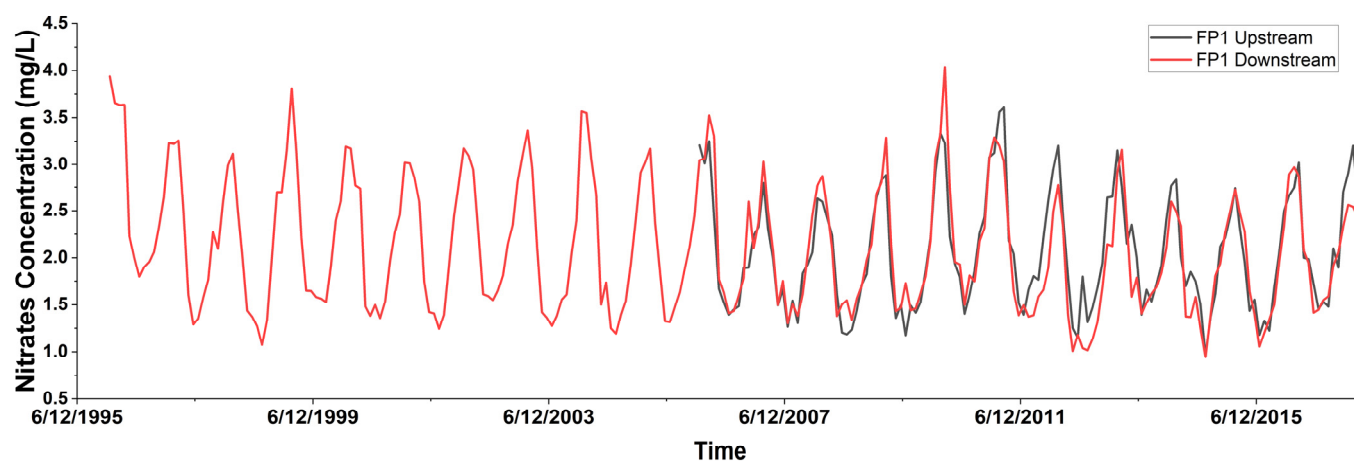

(a)

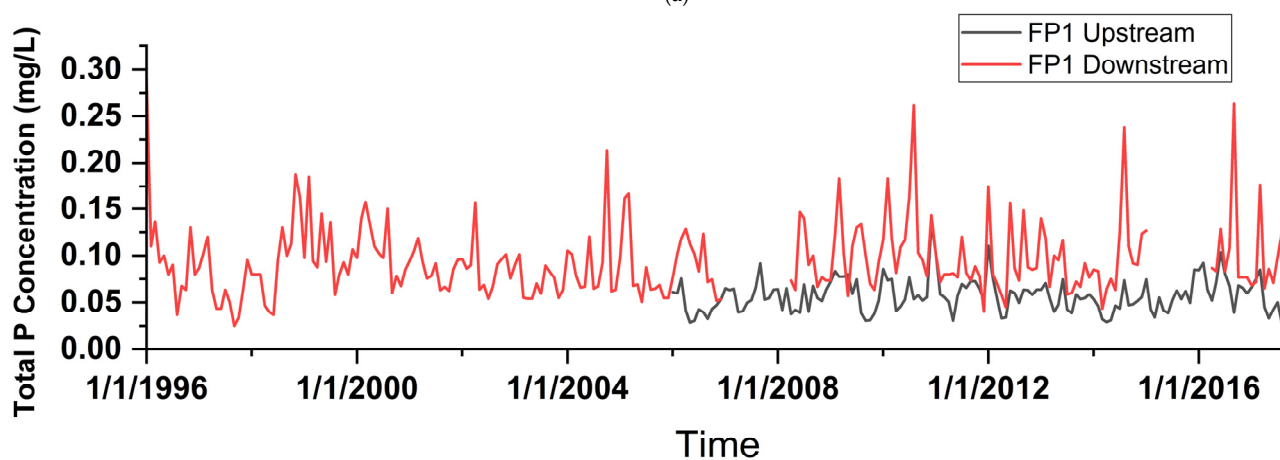

(b)

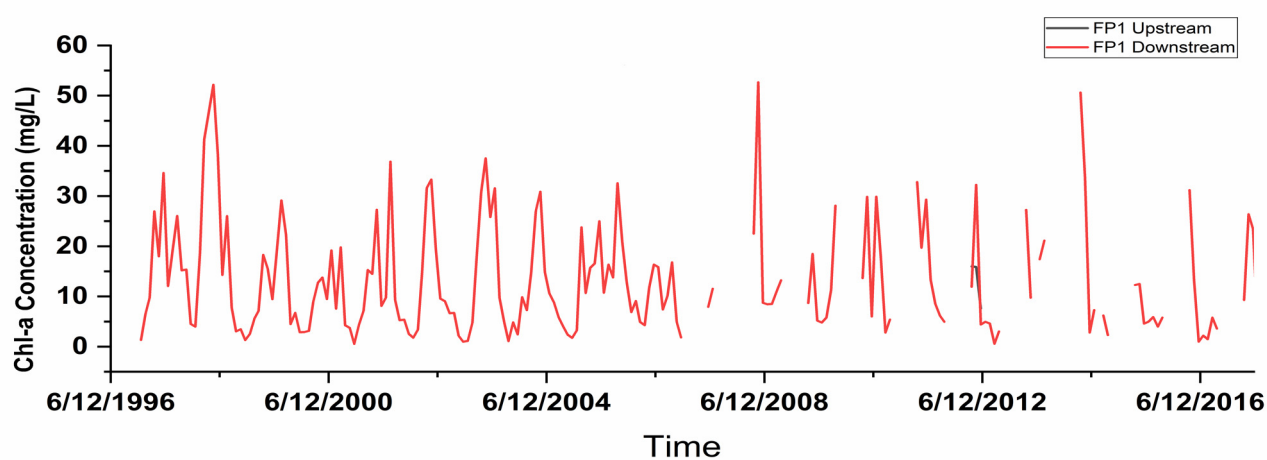

(c)

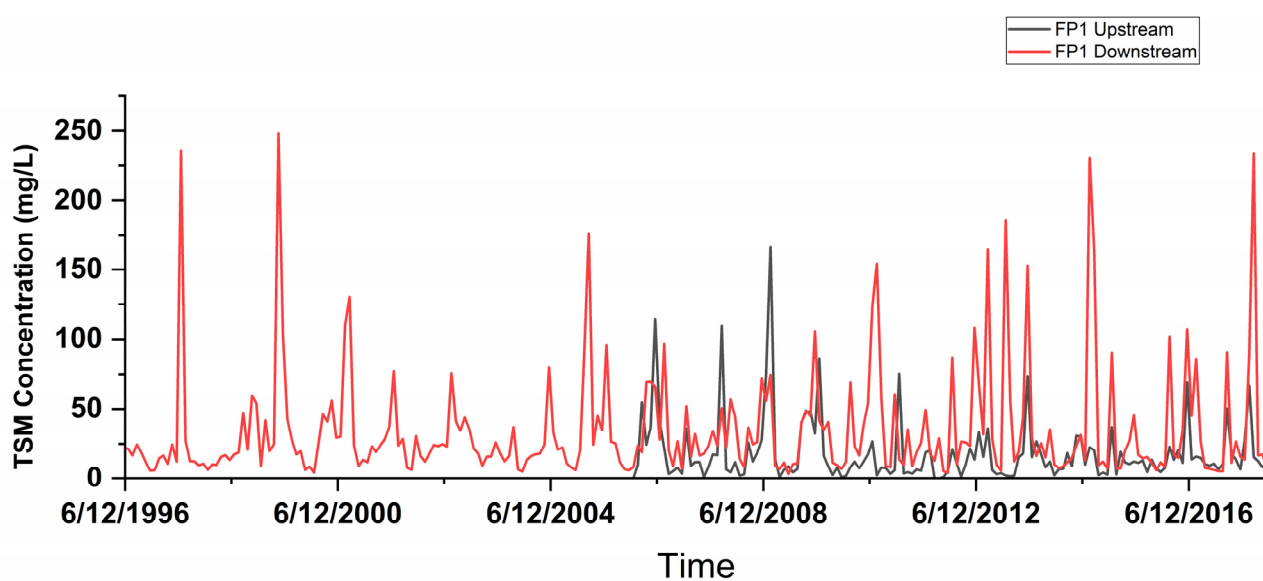

(d)

**Figure S1.** Time series plots for floodplain 1 showing the concentration of: a) Nitrates, b) Total Phosphorus, c) Chlorophyll-a and d) TSM.

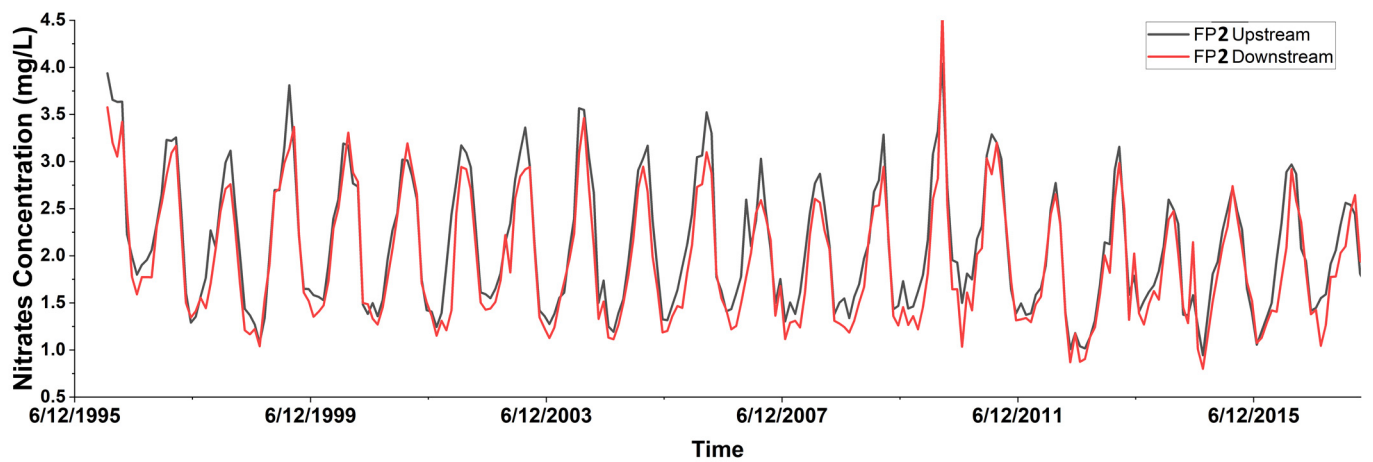

(a)

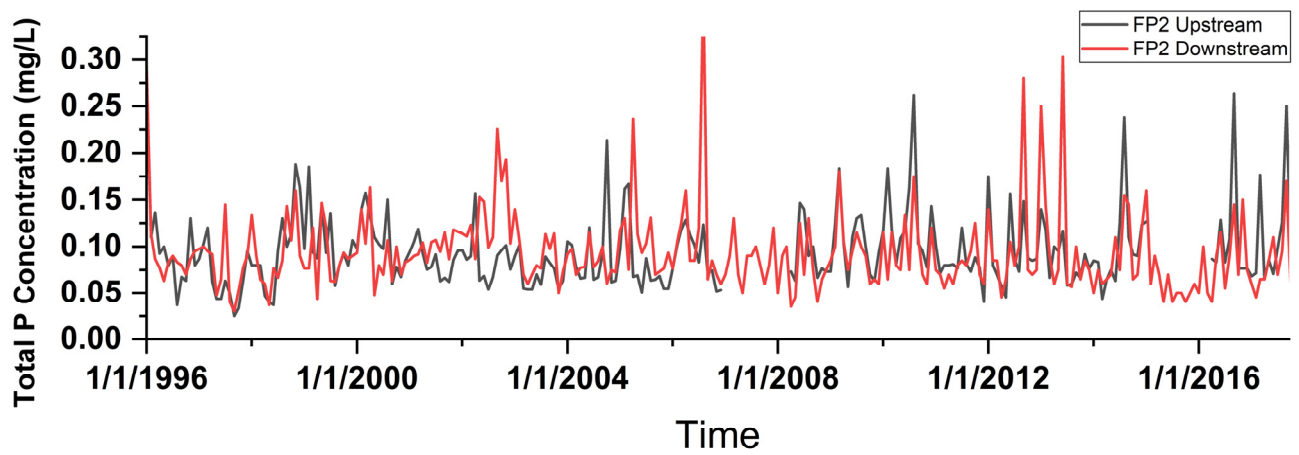

(b)

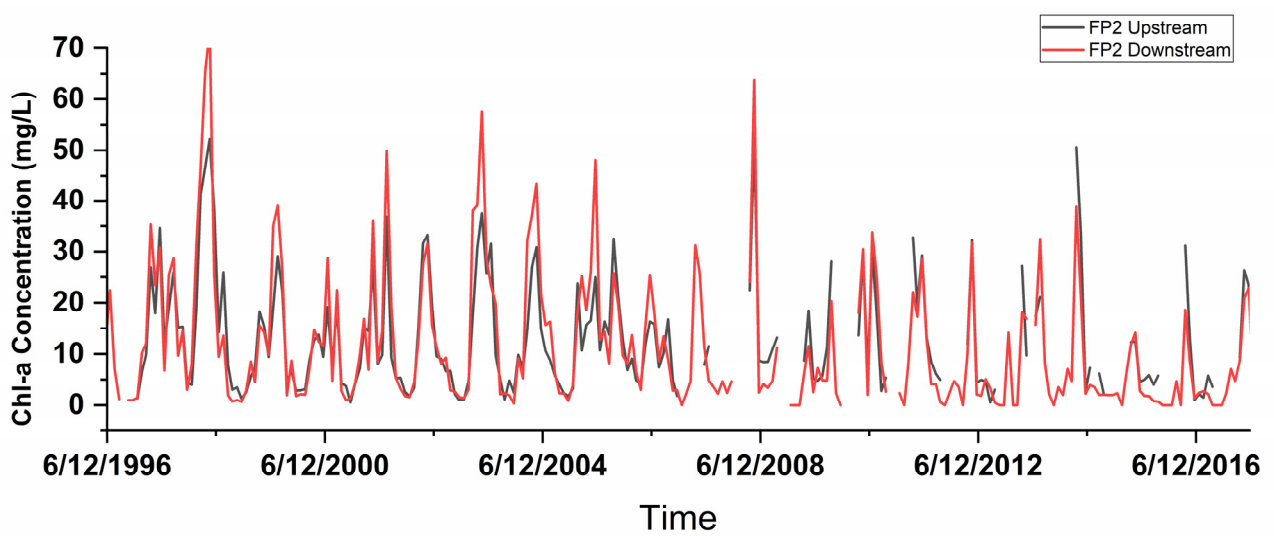

(c)

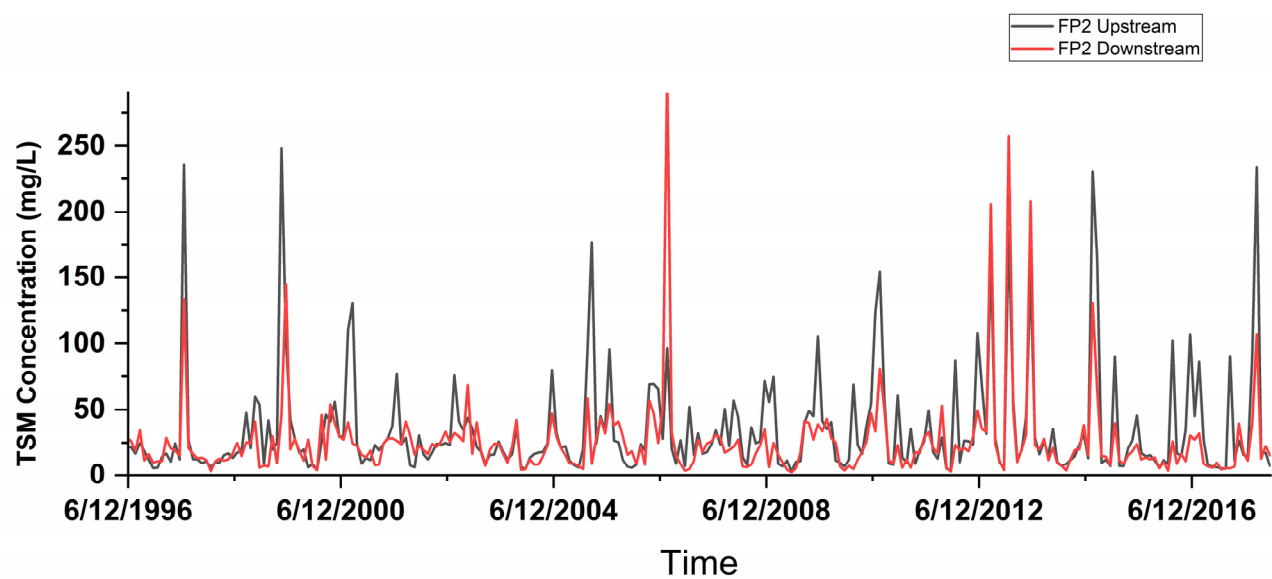

(d)

**Figure S2.** Time series plots for floodplain 2 showing the concentration of: a) Nitrates, b) Total Phosphorus, c) Chlorophyll-a and d) TSM.

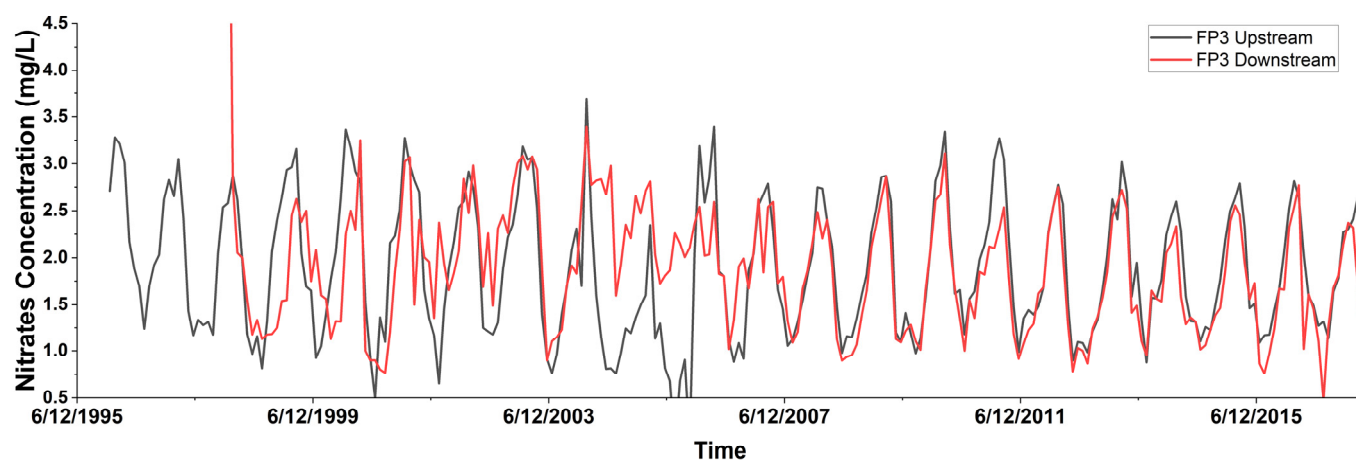

(a)



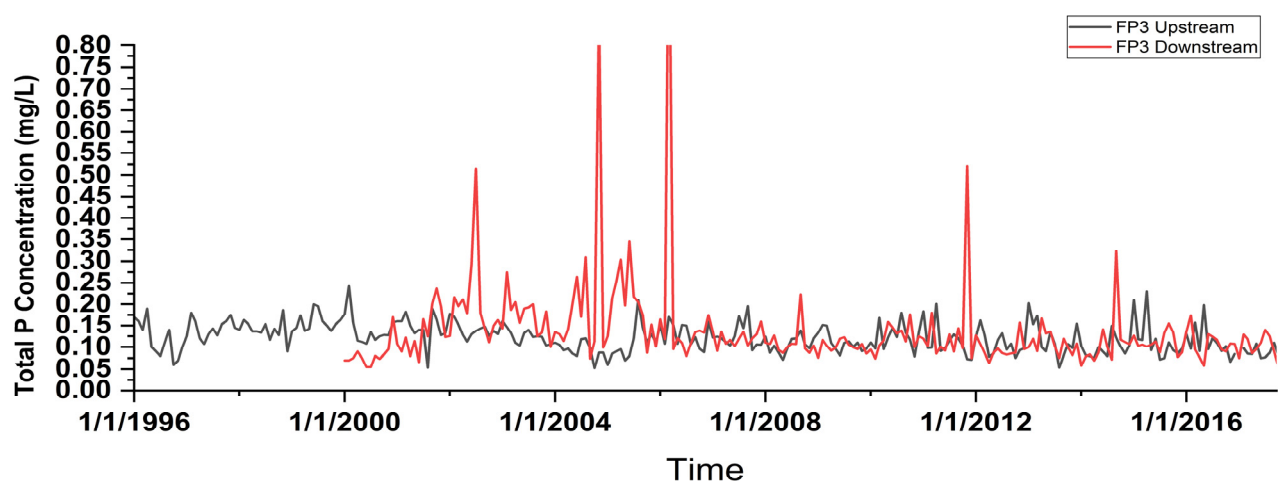

(b)

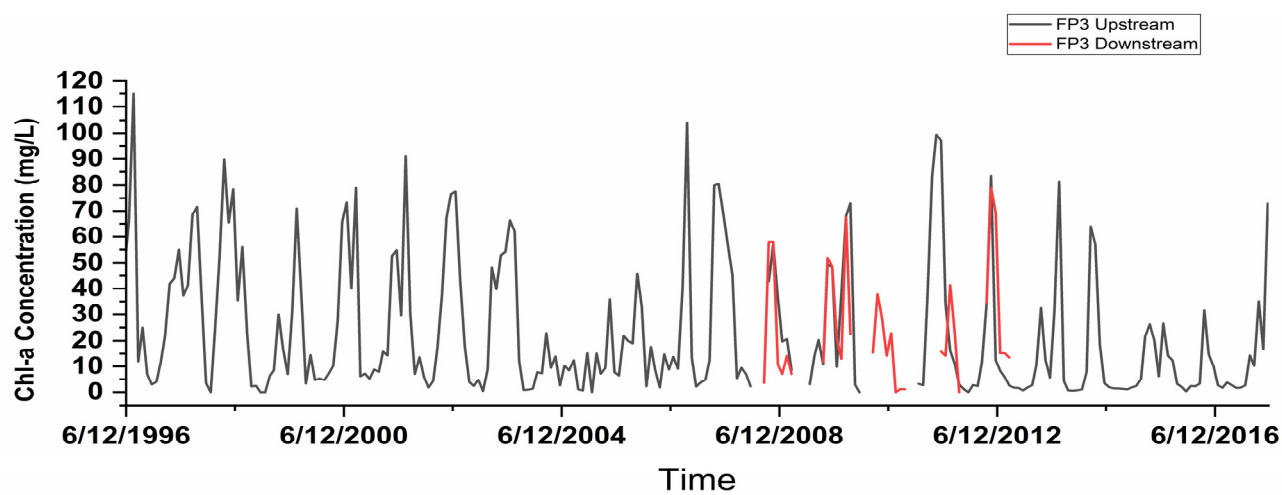

(c)

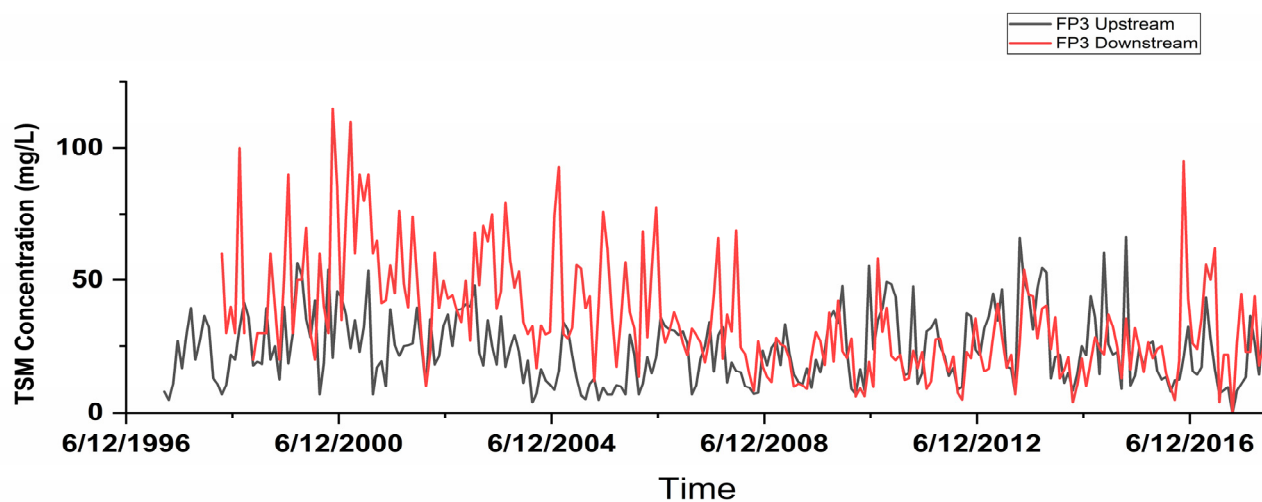

(d)

**Figure S3.** Time series plots for floodplain 3 showing the concentration of: a) Nitrates, b) Total Phosphorus, c) Chlorophyll-a and d) TSM.

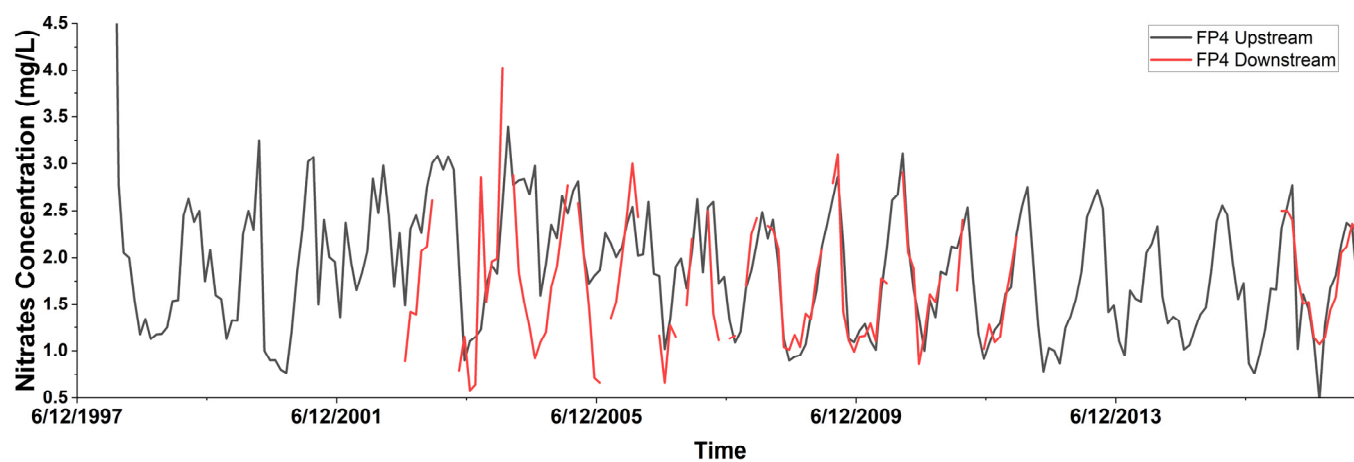

(a)

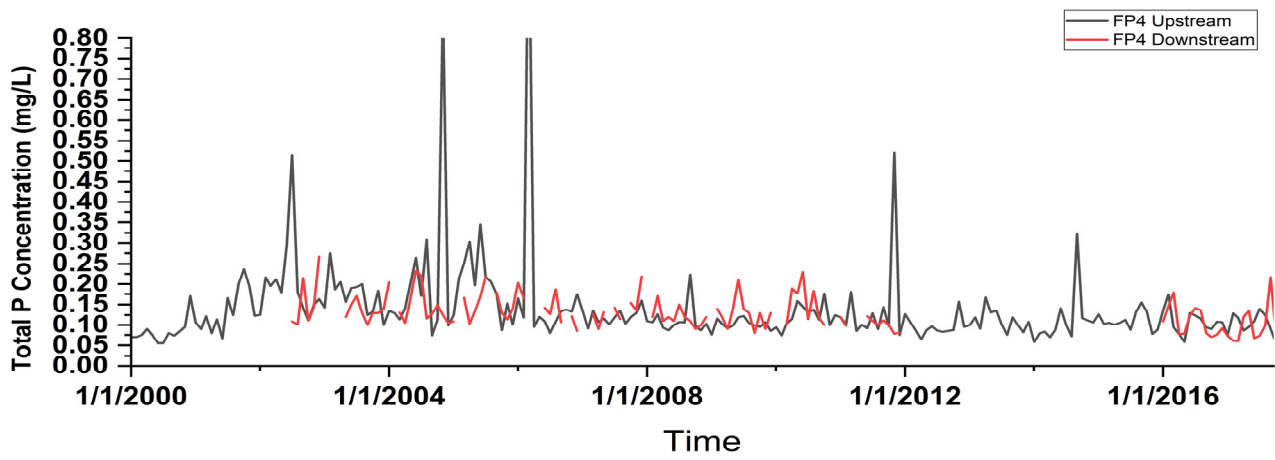

(b)

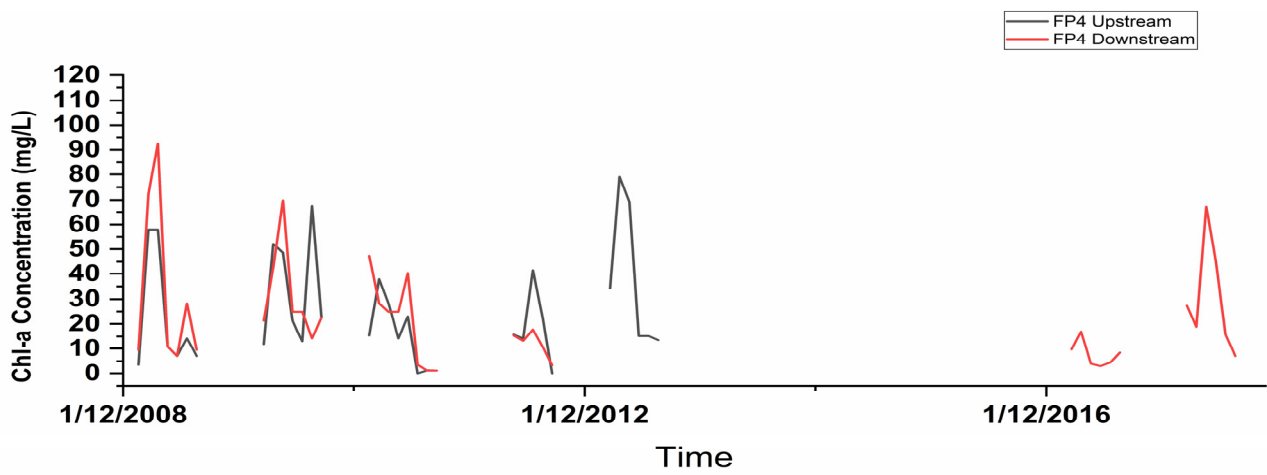

(c)

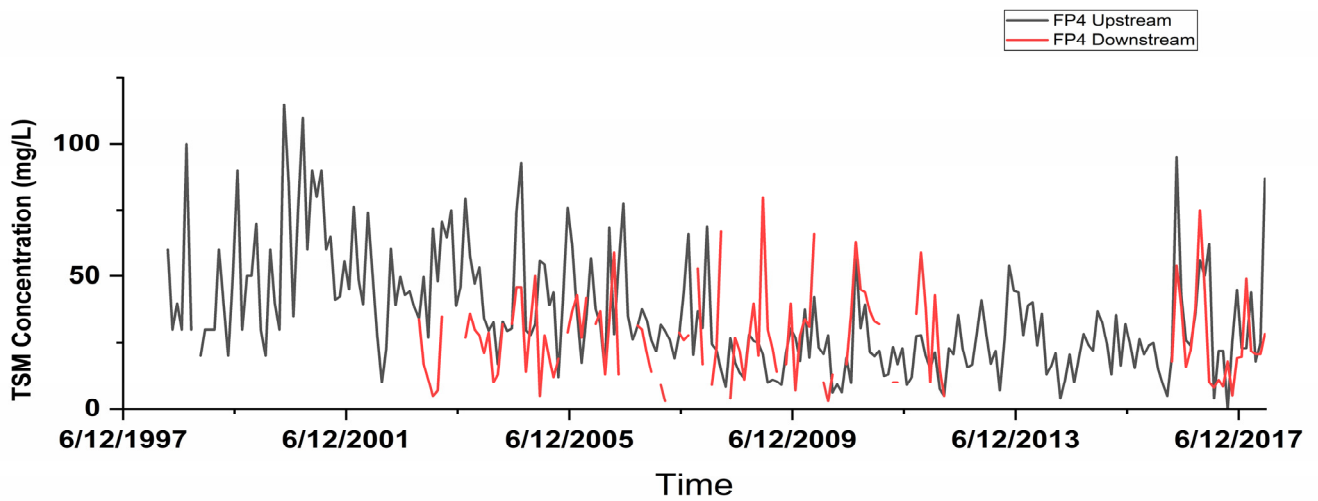

(d)

**Figure S4.** Time series plots for floodplain 4 showing the concentration of: a) Nitrates, b) Total Phosphorus, c) Chlorophyll-a and d) TSM.

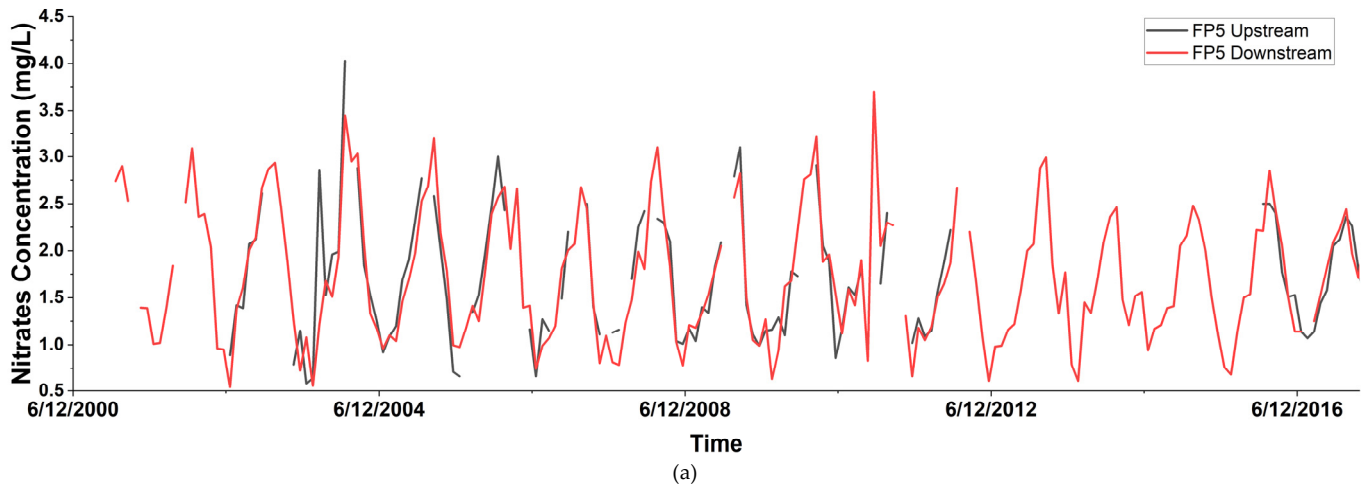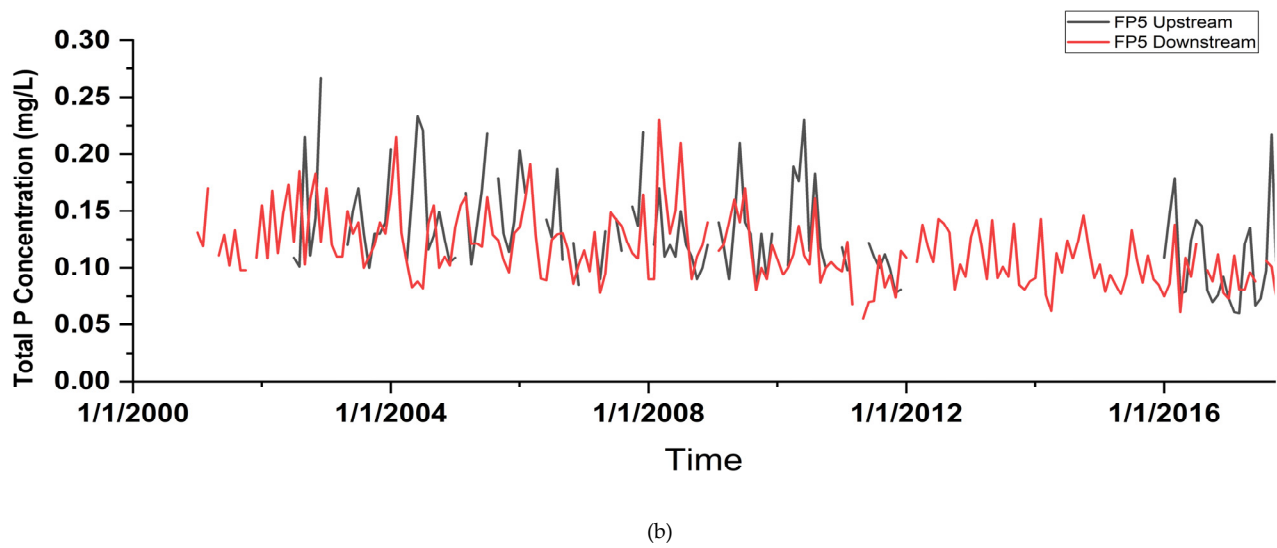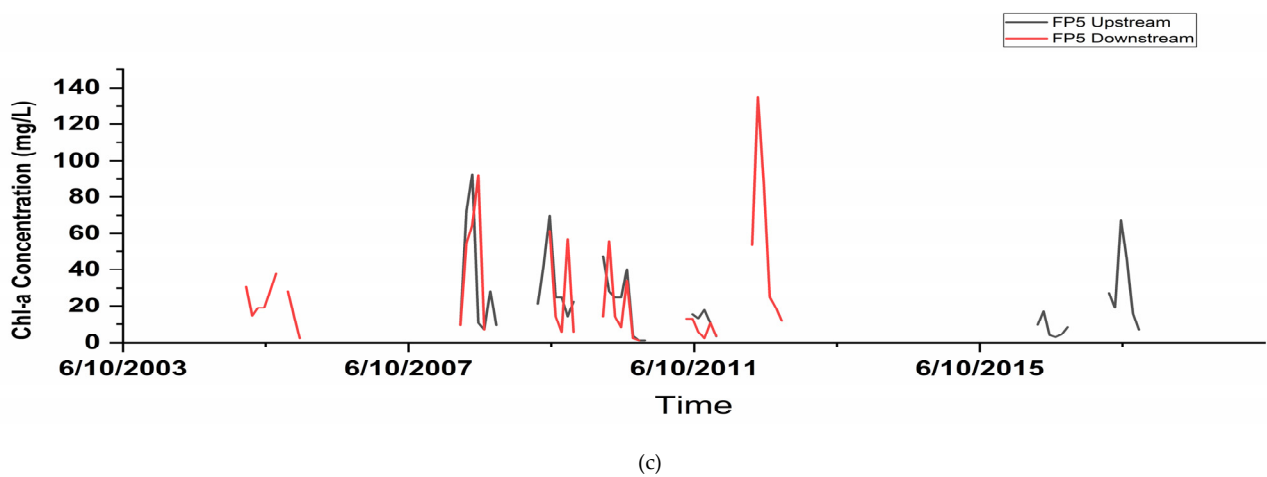

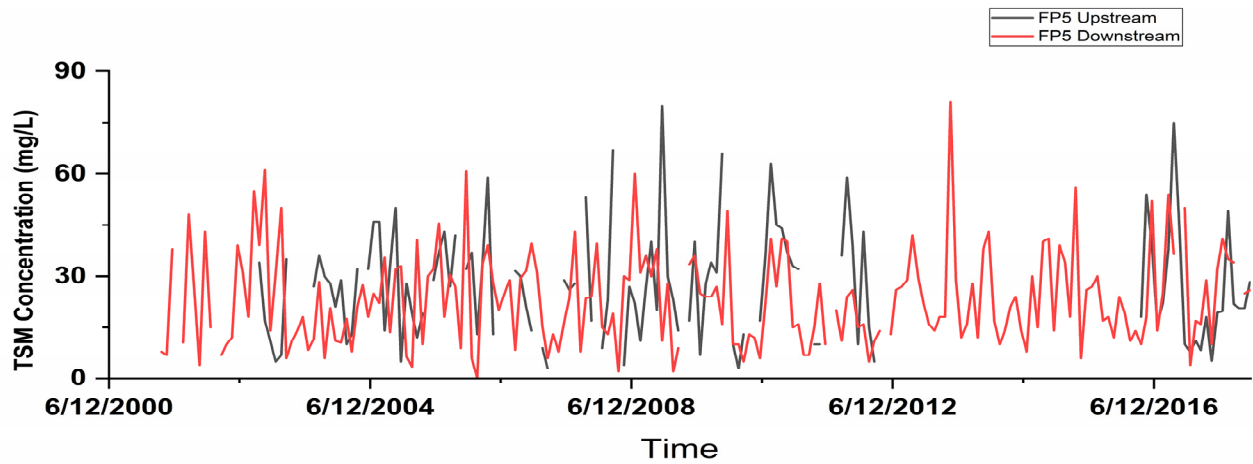

(d)

**Figure S5.** Time series plots for floodplain 5 showing the concentration of: a) Nitrates, b) Total Phosphorus, c) Chlorophyll-a and d) TSM.

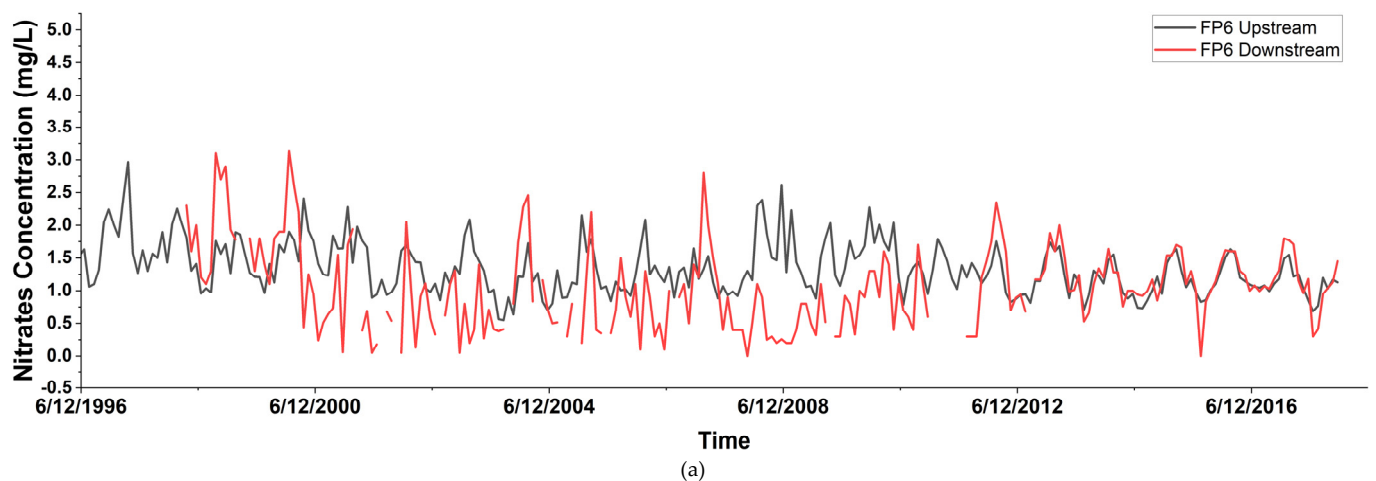

(a)

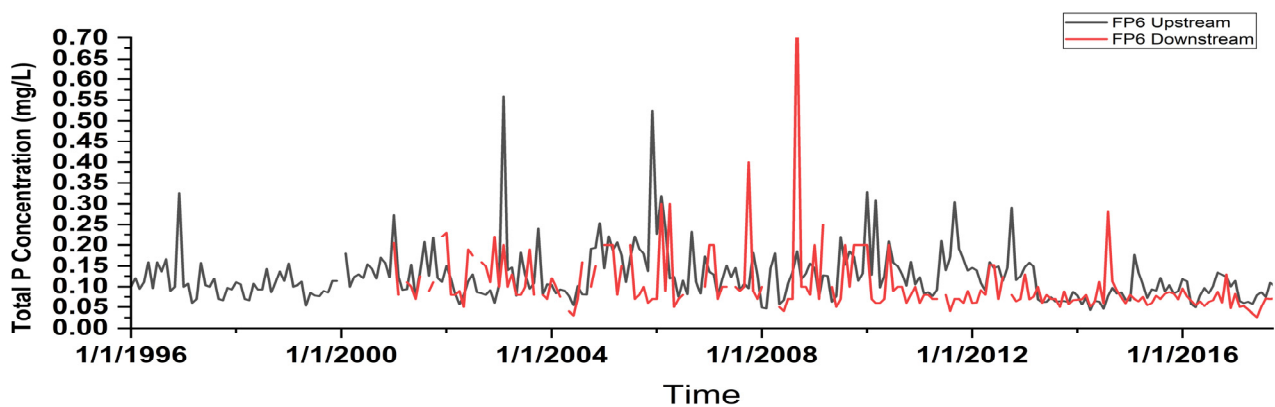

(b)

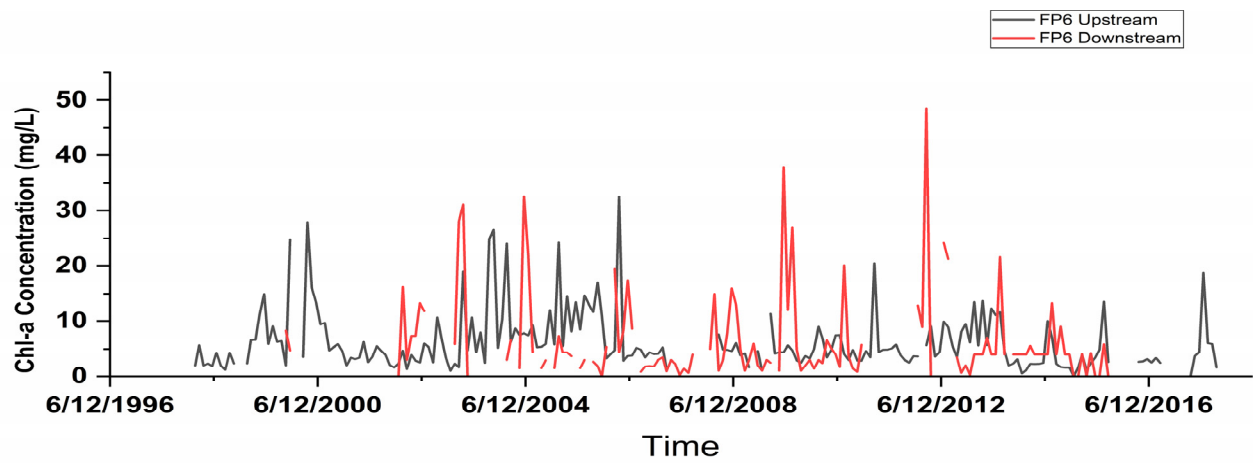

(c)

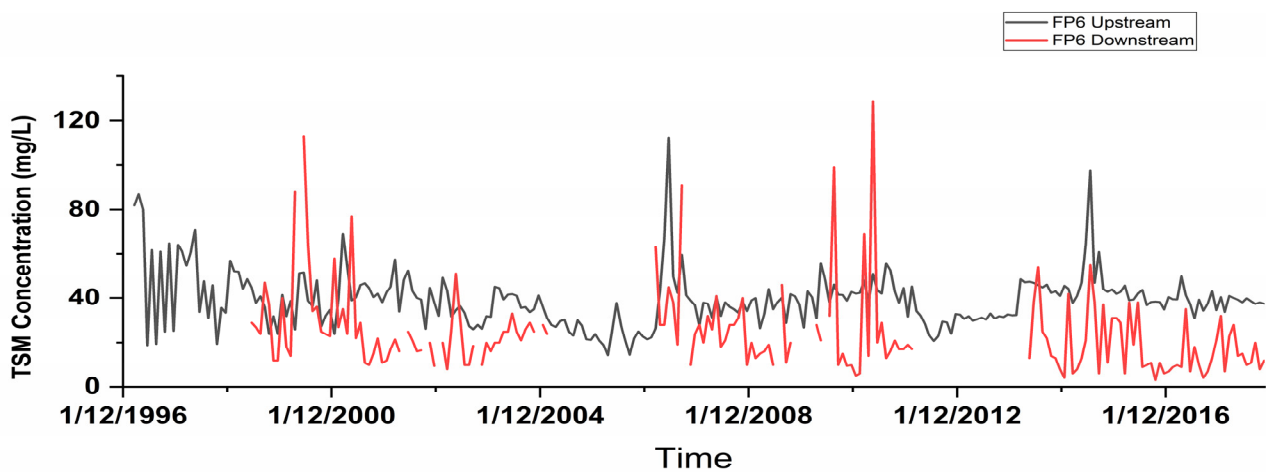

(d)

**Figure S6.** Time series plots for floodplain 6 showing the concentration of: a) Nitrates, b) Total Phosphorus, c) Chlorophyll-a and d) TSM.

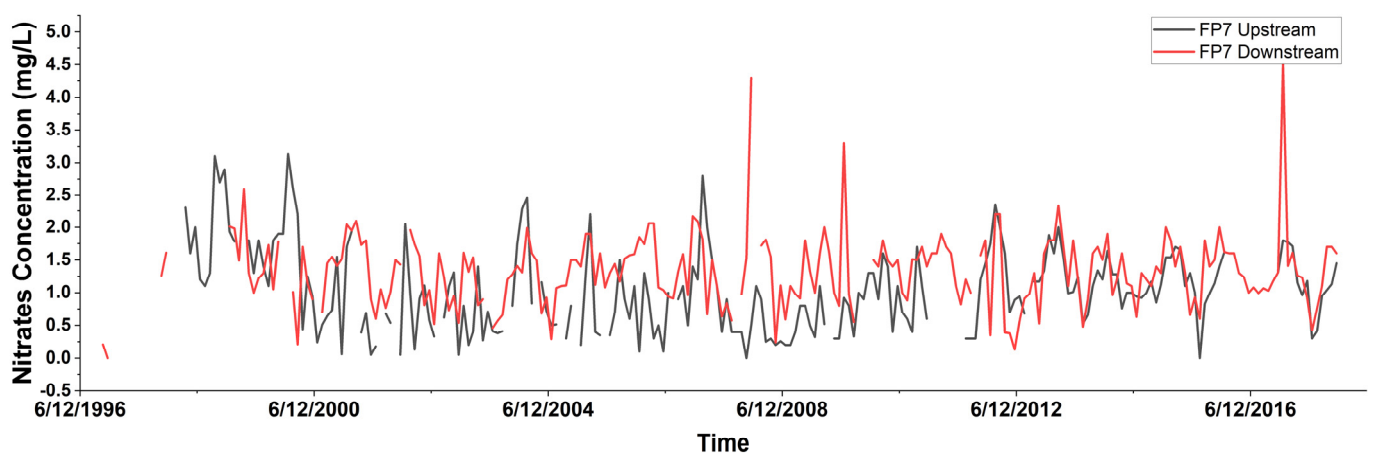

(a)

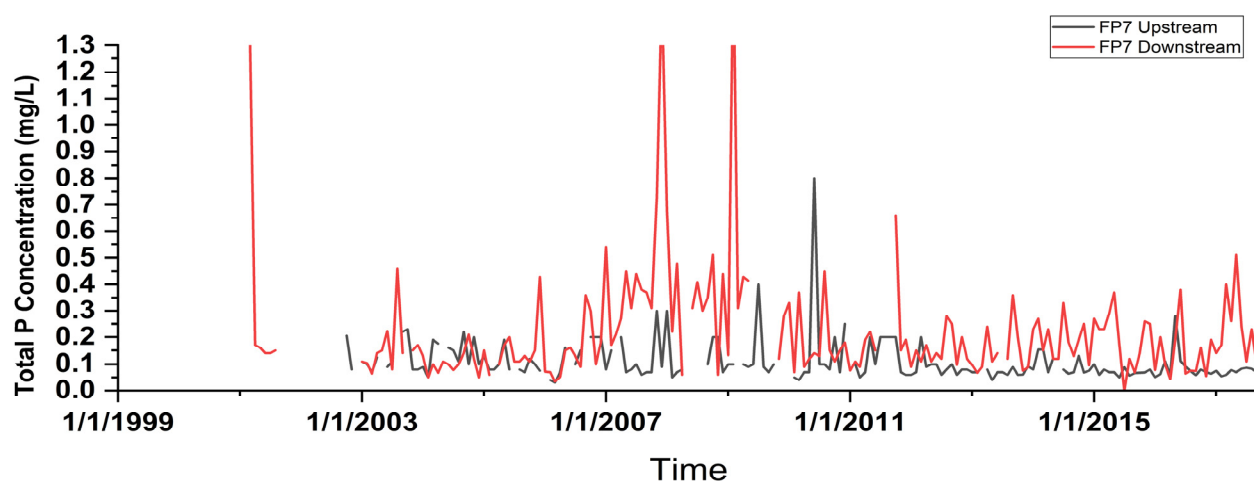

(b)

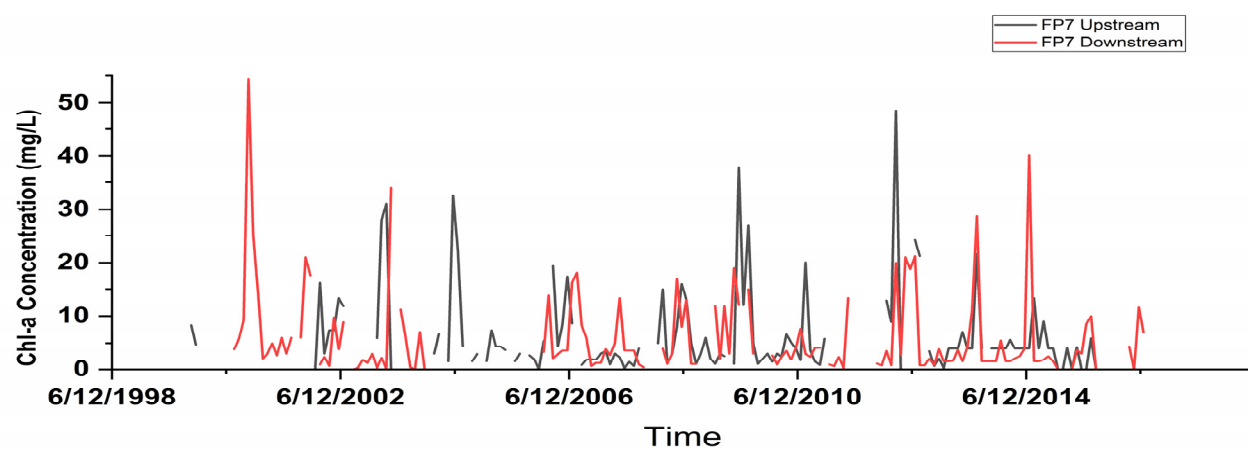

(c)

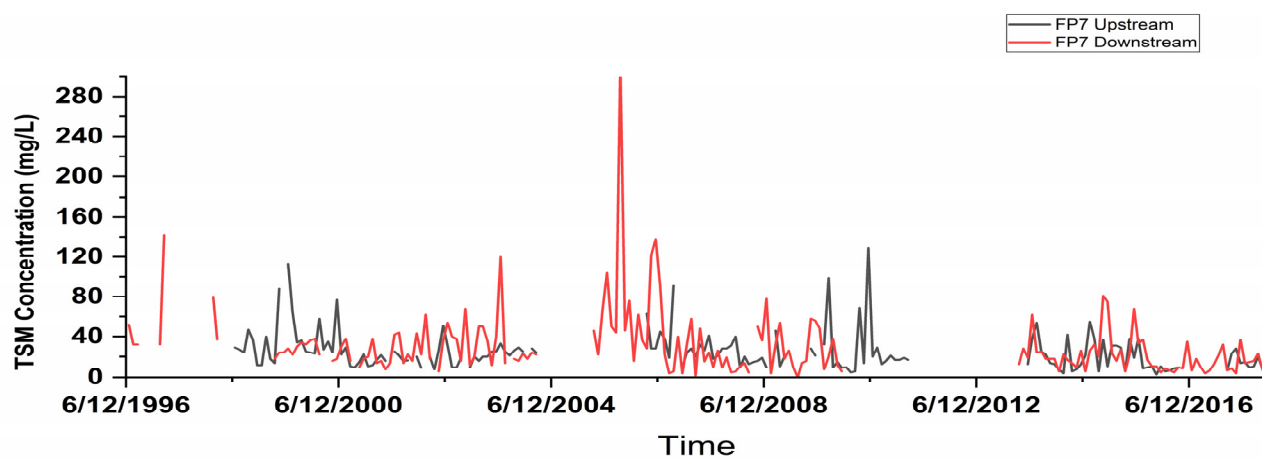

(d)



**Figure S7.** Time series plots for floodplain 7 showing the concentration of: a) Nitrates, b) Total Phosphorus, c) Chlorophyll-a and d) TSM.

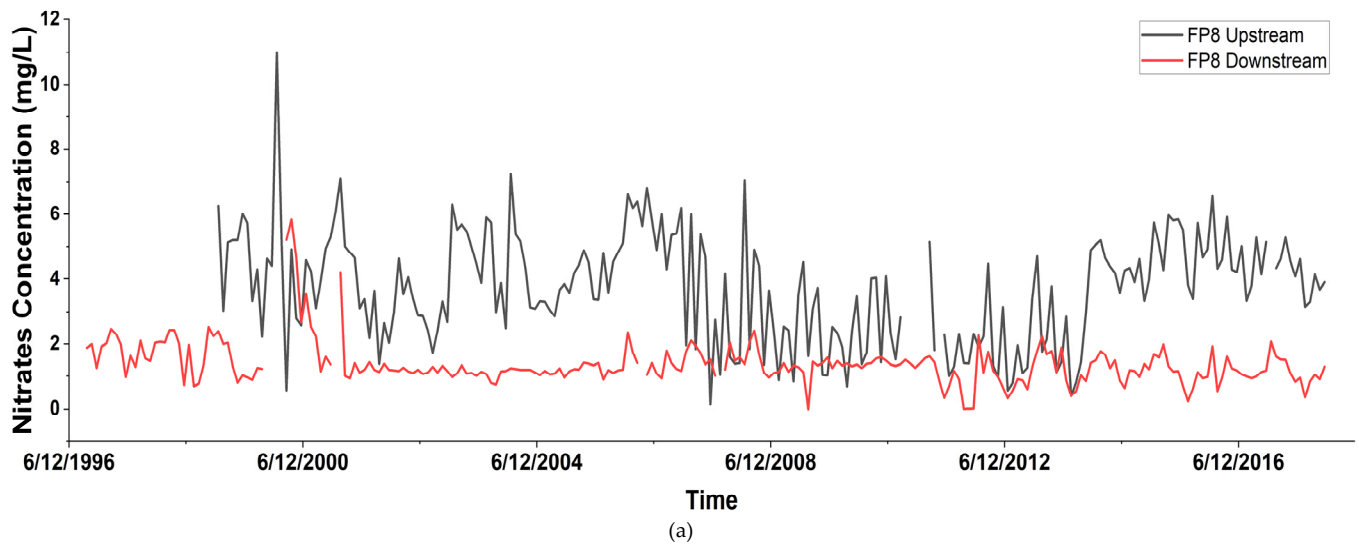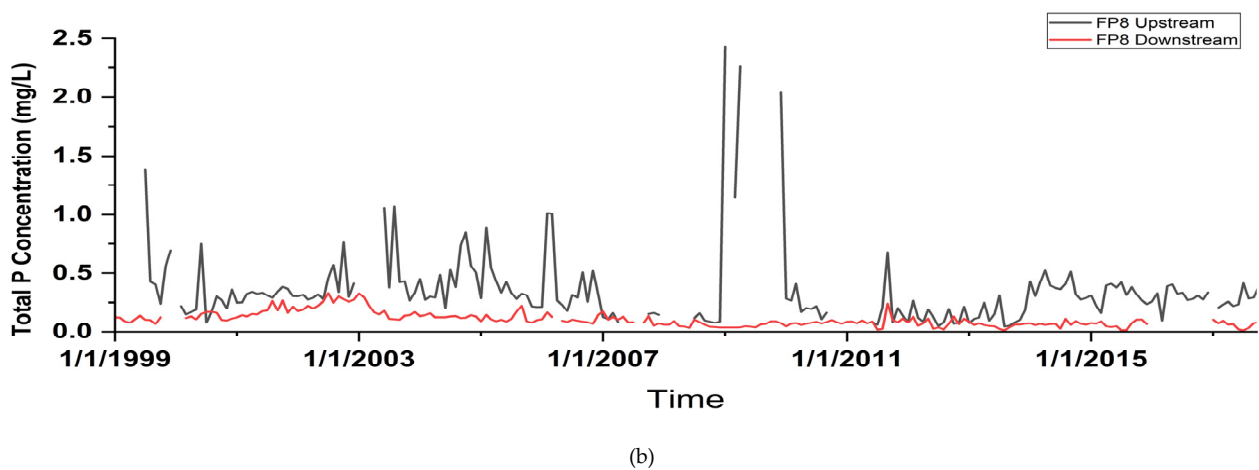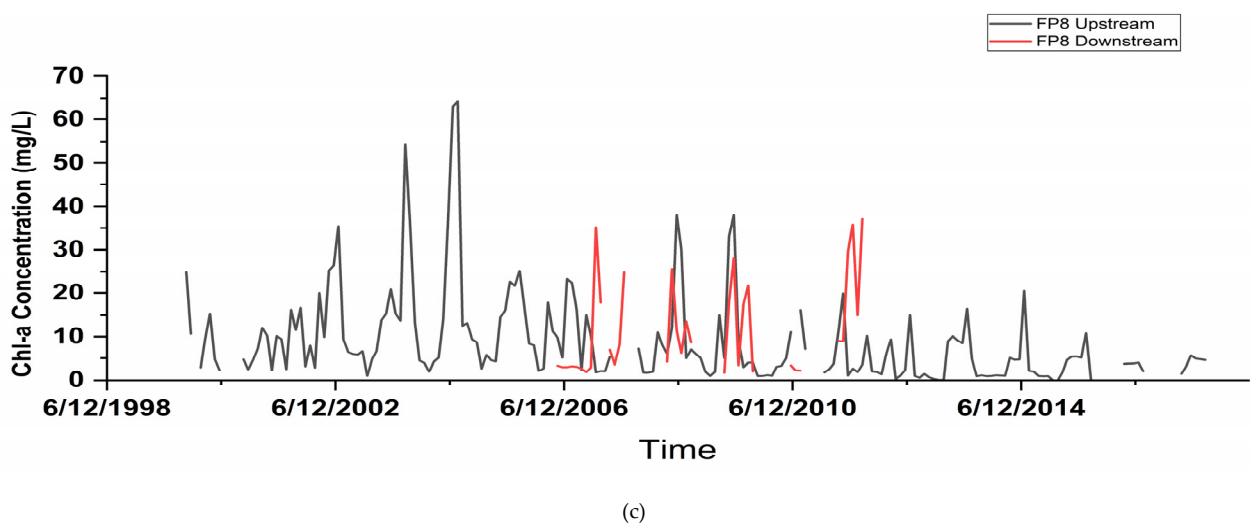

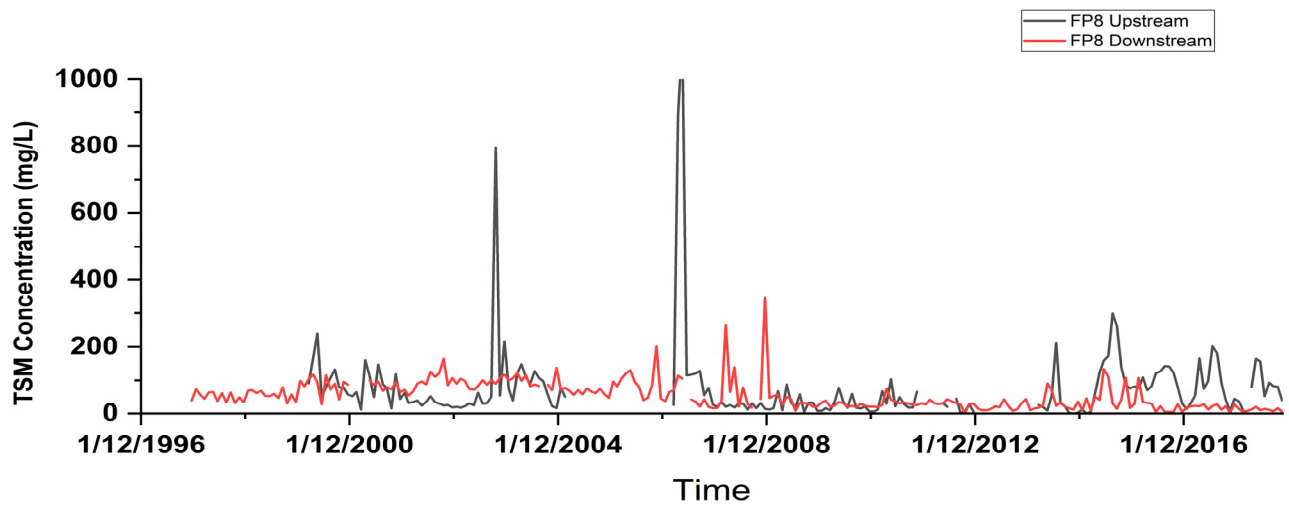

(d)

**Figure S8.** Time series plots for floodplain 8 showing the concentration of: a) Nitrates, b) Total Phosphorus, c) Chlorophyll-a and d) TSM.

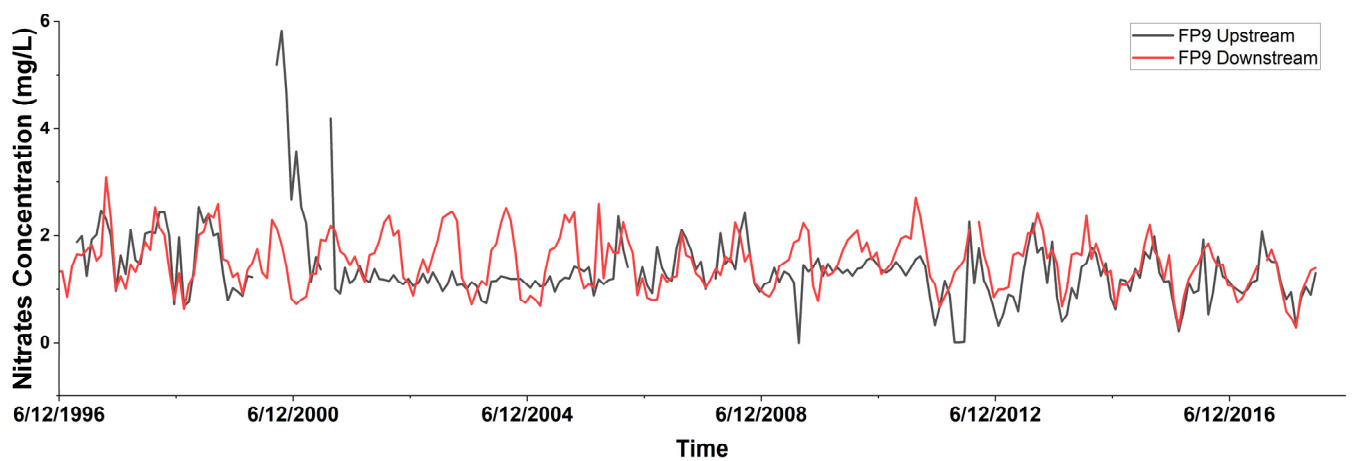

(a)

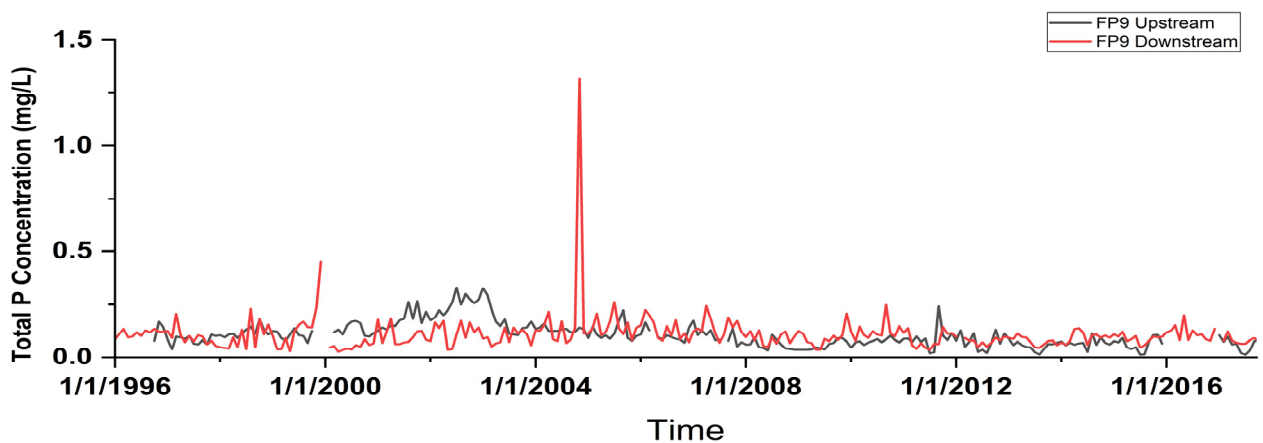

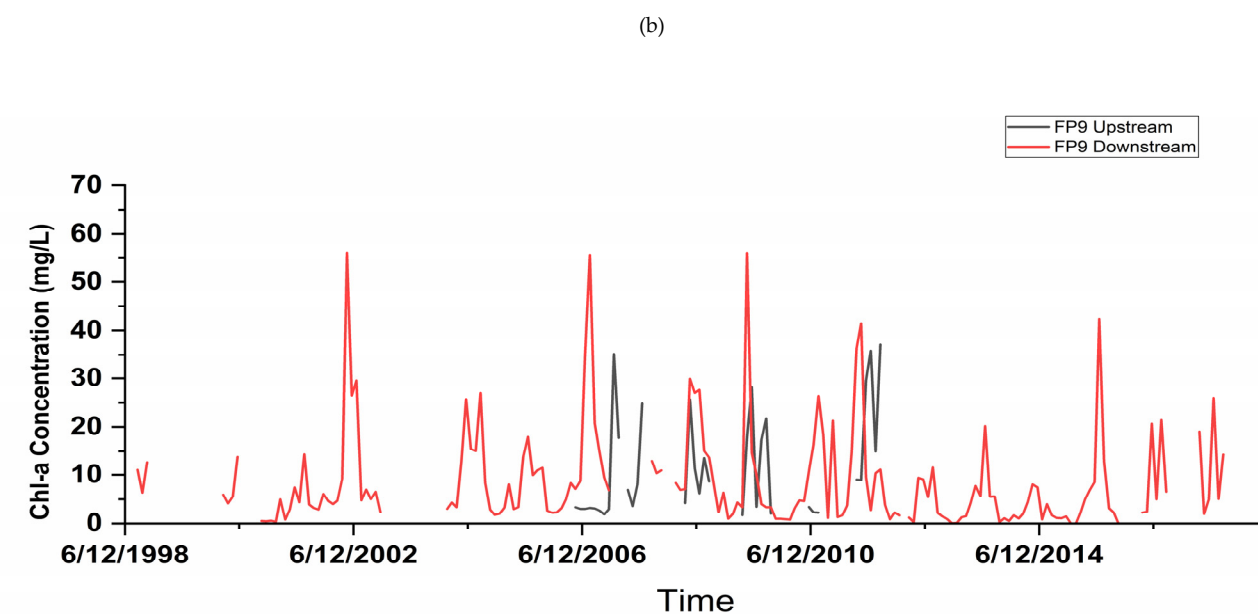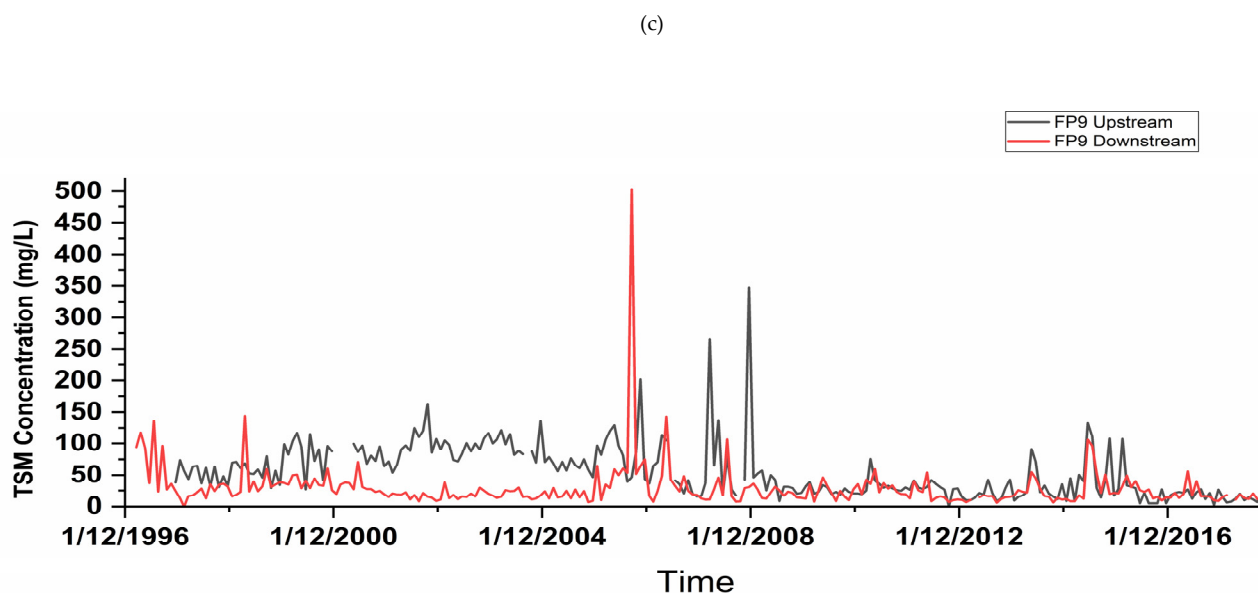

(d)

**Figure S9.** Time series plots for floodplain 9 showing the concentration of: a) Nitrates, b) Total Phosphorus, c) Chlorophyll-a and d) TSM.

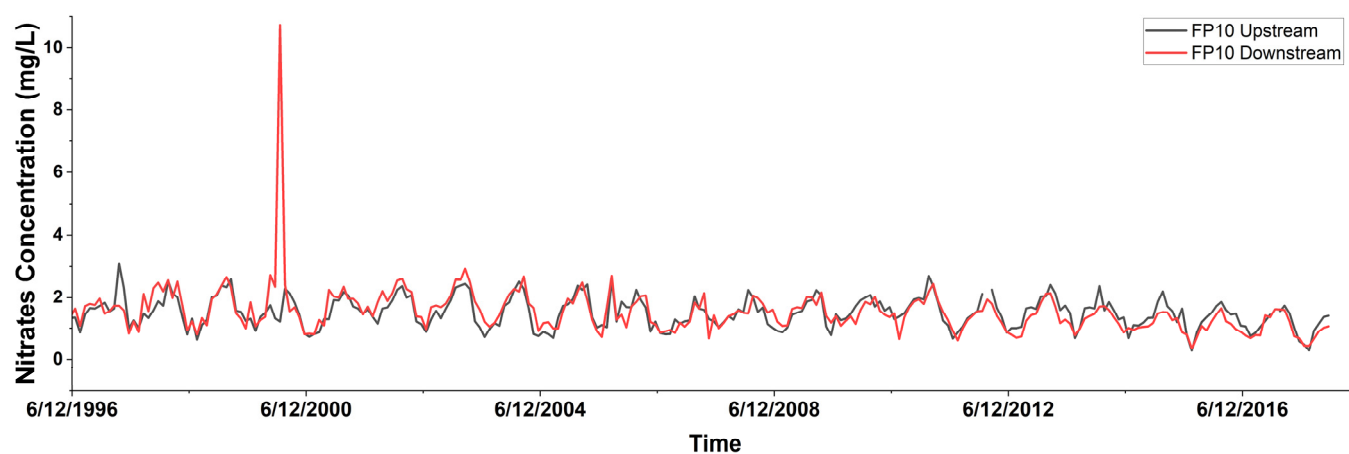

(a)

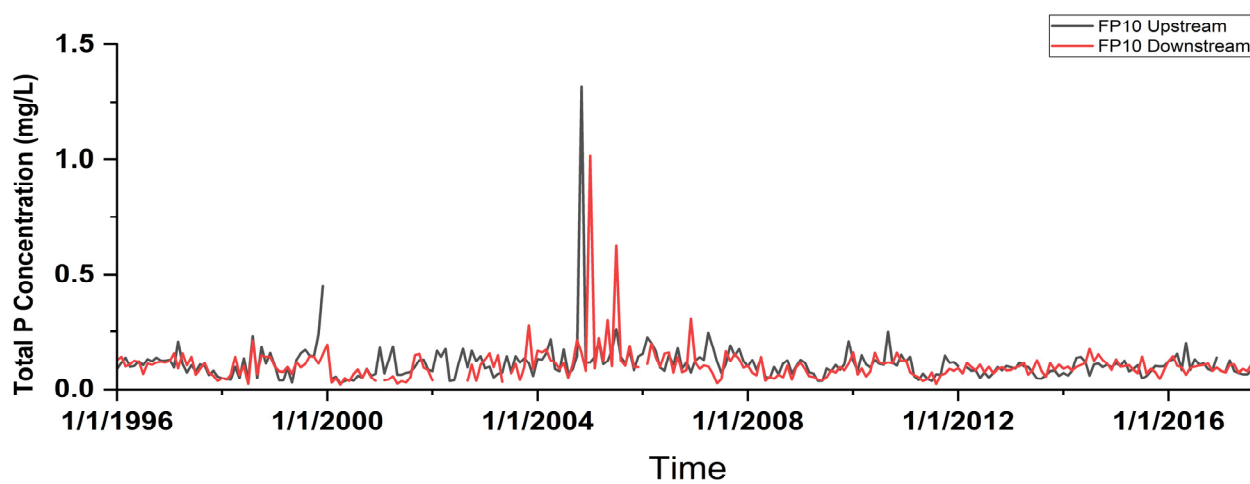

(b)

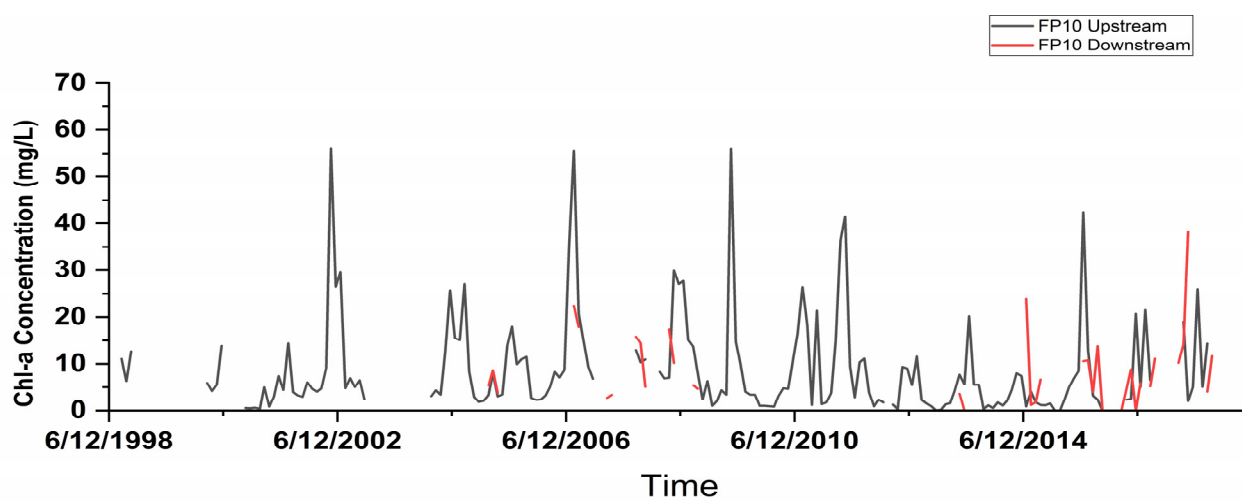

(c)

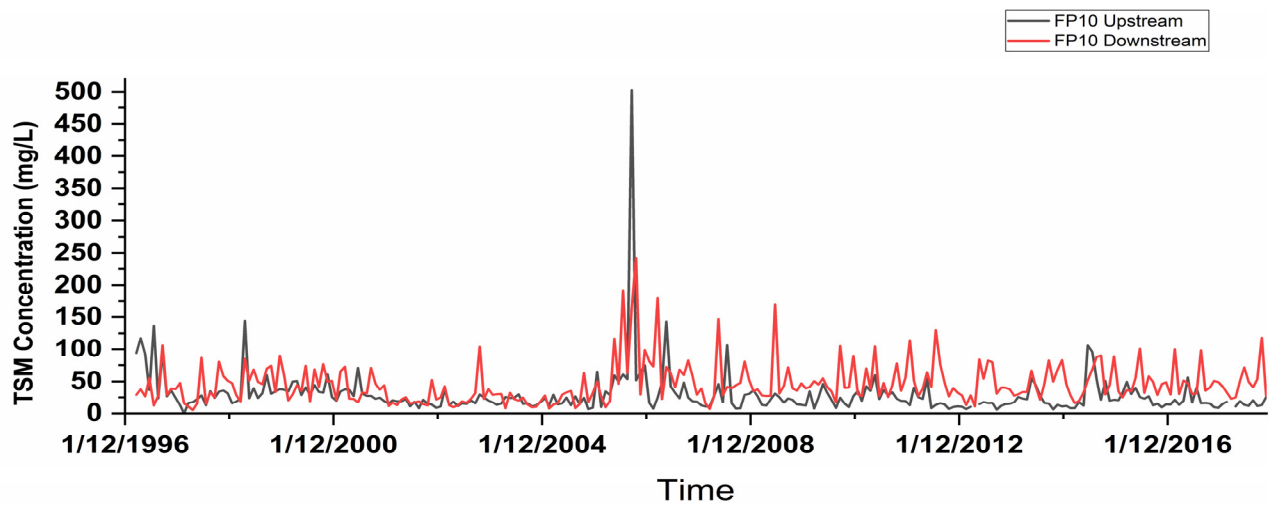

(d)

**Figure S10.** Time series plots for floodplain 10 showing the concentration of: a) Nitrates, b) Total Phosphorus, c) Chlorophyll-a and d) TSM.

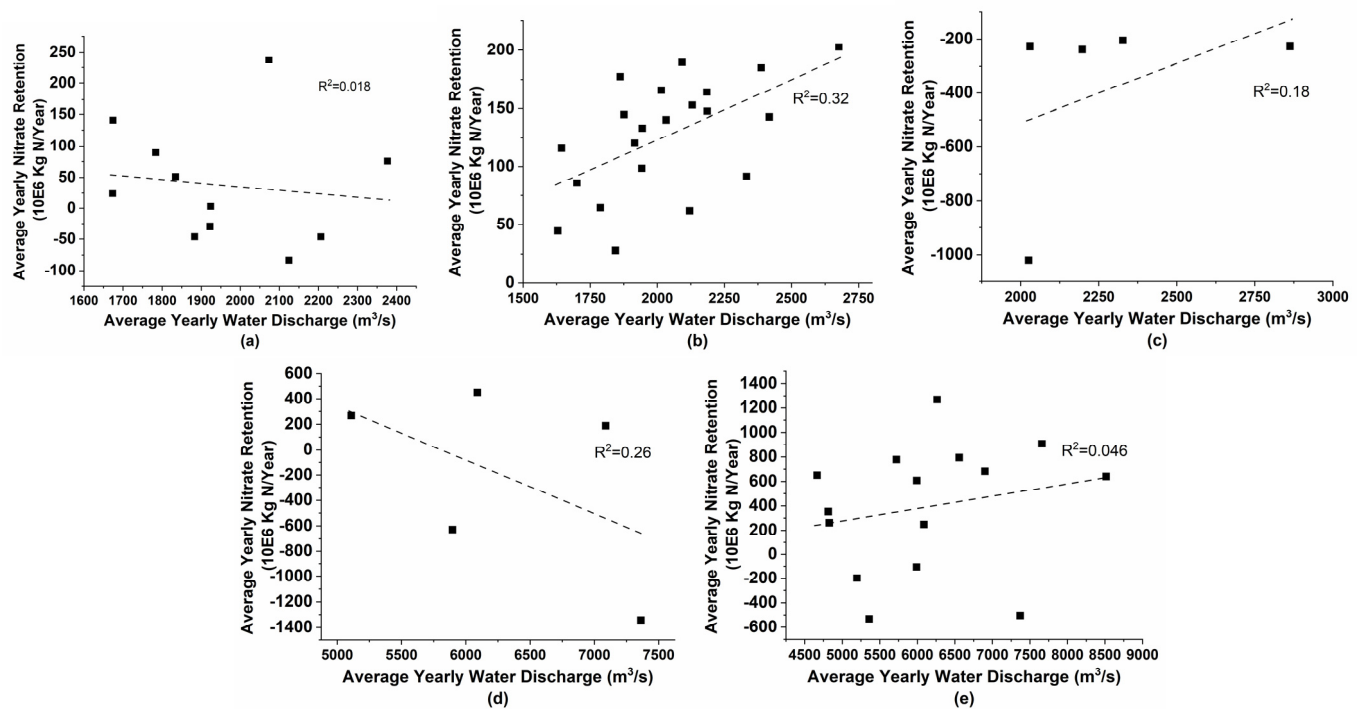

**Figure S11.** Correlation between the Nitrogen Retention and the water discharge values for: a) FP1, b) FP2, c) FP3, d) FP9 and e) FP10.

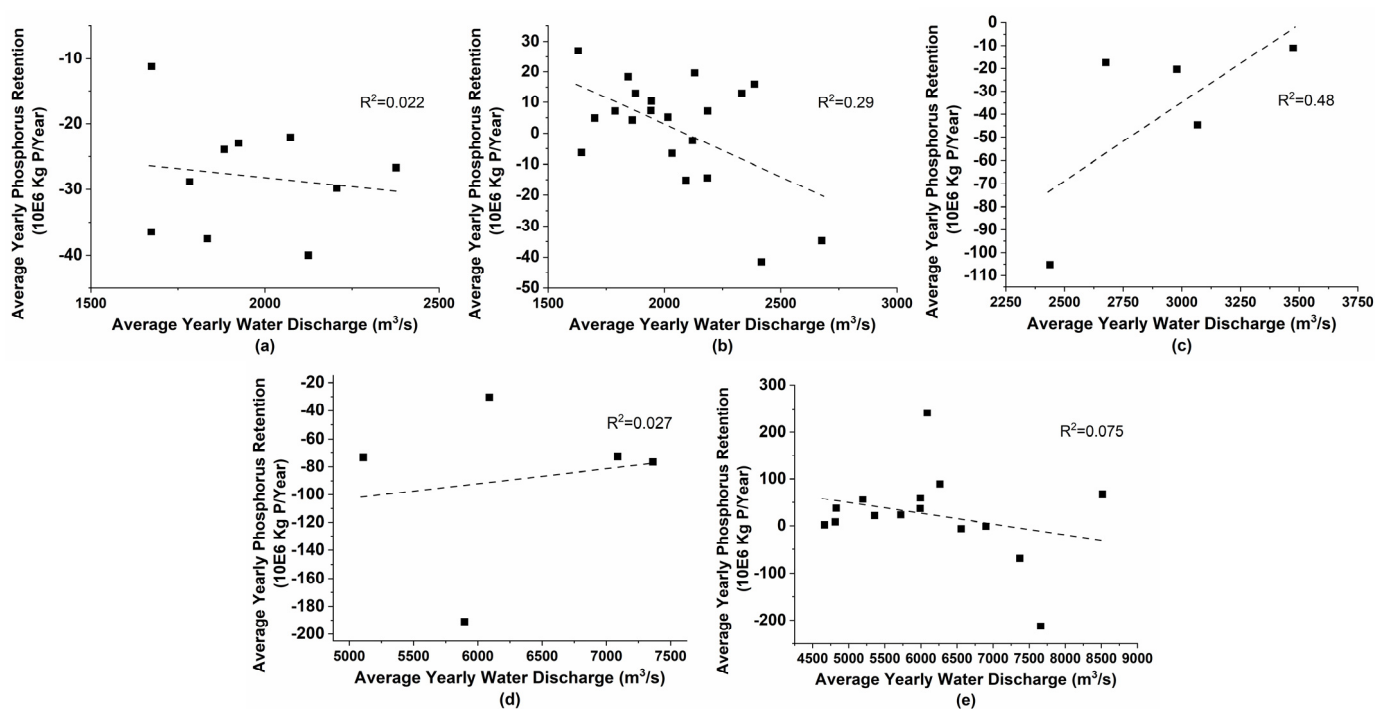

**Figure S12.** Correlation between the Phosphorus Retention and the water discharge values for: a) FP1, b) FP2, c) FP3, d) FP9 and e) FP10.

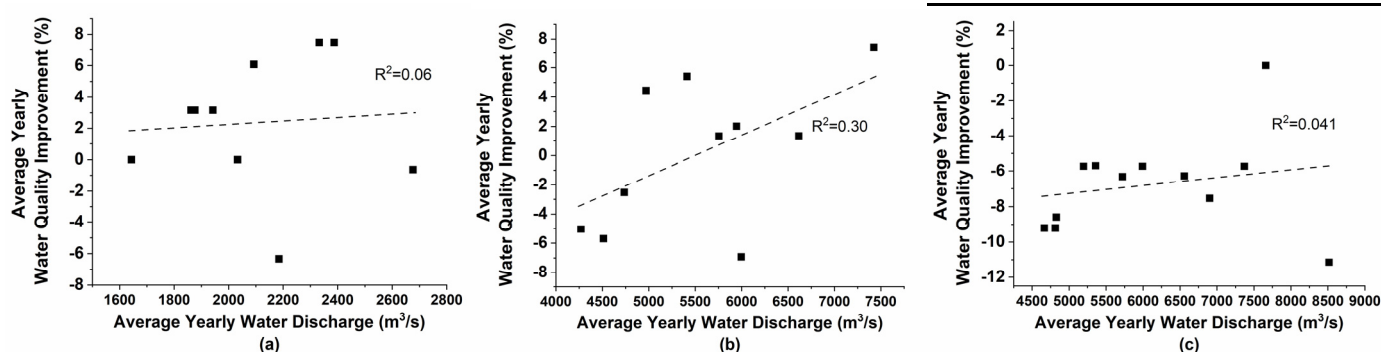

**Figure S13.** Correlation between the water quality improvement and the water discharge values for: a) FP2, b) FP6 and c) FP10.
